# Supplementary material for: Isolation and Bacteriocin-Related Typing of Streptococcus dentisani
Source: Front Cell Infect Microbiol. 2019 Apr 16;9:110. doi: 10.3389/fcimb.2019.00110 (PMC6476965; doi:10.3389/fcimb.2019.00110)
Supplement: Supplementary file 2 [file Table_2.XLSX]

## Sheet: Tabelle1
region_name	region_size	gene_name	gene_start	gene_end	gene_strand	real_start	real_end	real_strand	gene_color	function	motifs	annotation	protein	dna
gi_482660080_emb_CAUJ010000071_.3.AOI_02	orf00027	orf00027	6382	6591	-	42484	42693	+	#d5dce8	hypothetical bacteriocin: some similarity with BlpO, class IIc?			MKAIFYIILFAFQTYLIYLSISTSDKKQKTIELTSLNCFVILFLIYDKLFFLFIAYVFLIIFILNLFRN	ATGAAGGCTATATTCTATATTATTCTCTTCGCTTTCCAAACATATCTTATTTATCTATCTATAAGTACCTCTGATAAAAAACAAAAGACTATTGAATTAACATCATTGAATTGTTTTGTCATATTATTTCTAATCTATGATAAATTATTTTTTCTCTTCATTGCCTATGTTTTTTTGATAATTTTTATATTAAACTTGTTCCGTAAC
gi_482660080_emb_CAUJ010000071_.3.AOI_02	orf00028	36.2;BlpN	6610	6783	-	42292	42465	+	#70c947	BlpN: Bacteriocin_IIa; 36.2;BlpN	<a href=http://pfam.xfam.org/family/PF10439>PF10439</a>;	Bacteriocin class II with double-glycine leader peptide; Evalue=5e-25 match=91.23%;	MLSEIYGGNSGGAAVVAALGCAAGGVKYGKFLGPWGAAIGGIGGALICGYLAYSATS	ATGTTAAGTGAGATTTATGGAGGTAATTCCGGAGGAGCGGCTGTAGTTGCTGCTTTAGGTTGTGCAGCGGGTGGAGTGAAATATGGGAAGTTTCTAGGACCATGGGGCGCTGCAATAGGAGGAATTGGAGGAGCATTGATTTGTGGATATTTAGCCTATAGTGCTACATCA
gi_482660080_emb_CAUJ010000071_.3.AOI_02	orf00030	33.2;BlpM	6829	7083	-	41992	42246	+	#70c947	BlpM: ComC; Bacteriocin_IIa; 263.1;Gassericin33.2;BlpM	<a href=http://pfam.xfam.org/family/PF03047>PF03047</a>; <a href=http://pfam.xfam.org/family/PF10439>PF10439</a>;	NA; Bacteriocin class II with double-glycine leader peptide; Evalue=3e-13 match=40.51%;Evalue=4e-56 match=97.62%;	MDTKMIEQFHEMDITMLSSIEGGKNNWQTNVLEGGGAAFGGWGLGTAICAASGVGAPFMGACGYIGAKFGVALWAGVTGATGGF	ATGGATACAAAAATGATAGAACAATTTCATGAAATGGATATAACTATGTTATCCAGTATTGAAGGAGGCAAGAATAATTGGCAAACTAATGTCTTAGAAGGTGGTGGTGCAGCTTTTGGTGGCTGGGGCTTAGGAACAGCCATTTGTGCTGCGAGTGGTGTTGGAGCGCCATTTATGGGAGCATGTGGATACATAGGAGCTAAATTTGGTGTGGCTCTTTGGGCAGGAGTAACAGGTGCAACGGGTGGATTT
gi_482660080_emb_CAUJ010000071_.3.AOI_02	orf00032	orf00032	7327	8364	-	40711	41748	+	#8fbcb9	Bacteriocin transport accessory protein, putative		Species=Streptococcus agalactiae CJB111 | | T<br>match=29.41%|Evalue=2e-09<br>UniRef:<a href=http://www.uniprot.org/uniprot/Q3DEX2_STRAG>Q3DEX2_STRAG</a>	MKKQNIKSLLLVPLVFASITTGVVYAEDQTTSSSIQTNDSSLVAPDLPSTKEKVENKPAVVTPEEYEQNVTDFKKIDIEAVRQSFTEDQLEHTIYFGRKTCSHCRQFSPELKEFNNLIEKKLEYYDLDGQDFDGEAREFLFKKVGIPGTPTILYLRNGHPISGWVGGGATAQQVYDYMYSRNSPKQTETVASSEDTVTENVHDEKTRNDSMSTSDKVVSESKGMSDEKRTEMKTSNDNPNSNSENSGKVESINSTSKAKTTQSGDLAMLDNKDQLETLKPIFDATQENKTPLTDVKEPDYVSQSITSNEKLLPKTGEEESYQLIRLAVAFFMASIMIKVKQKIHK	ATGAAGAAACAAAATATAAAATCGCTATTACTTGTGCCACTTGTATTTGCATCTATTACTACGGGTGTTGTATATGCAGAAGATCAGACTACTTCTTCCTCTATACAGACTAATGATAGTTCTCTTGTGGCACCAGATTTGCCATCGACTAAGGAAAAGGTGGAGAATAAACCTGCCGTTGTAACTCCAGAAGAGTATGAACAGAATGTTACGGACTTTAAAAAGATAGATATTGAAGCTGTACGTCAATCTTTTACAGAGGATCAATTAGAACATACTATTTATTTTGGTAGAAAAACTTGCTCTCATTGTCGTCAATTTTCTCCTGAATTGAAAGAATTTAATAACTTGATTGAAAAGAAGTTAGAGTATTATGATTTGGATGGTCAGGATTTTGAT…
gi_482660080_emb_CAUJ010000071_.3.AOI_02	orf00033	orf00033	8675	8884	-	40191	40400	+	#d5dce8	hypothetical protein			MKKYVYFLDLFARVLLILASIFLCIRVFMISTELWRNILVLVSTPITIYSLIKHRLDNKLYKNHSKKKL	ATGAAAAAATACGTATATTTTTTAGATTTGTTTGCCCGAGTTTTATTAATATTGGCGTCTATTTTTCTTTGCATAAGAGTATTCATGATTTCAACGGAACTCTGGAGAAATATTTTGGTACTGGTAAGTACTCCTATTACAATCTATAGTCTGATAAAACATAGATTAGATAATAAGCTATATAAAAATCATAGTAAGAAAAAGTTA
gi_482660080_emb_CAUJ010000071_.3.AOI_02	orf00034	27.2;BlpJ	9193	9393	-	39682	39882	+	#70c947	BlpN/K: ComC; Bacteriocin_IIa; 27.2;BlpJ	<a href=http://pfam.xfam.org/family/PF03047>PF03047</a>; <a href=http://pfam.xfam.org/family/PF10439>PF10439</a>;	NA; Bacteriocin class II with double-glycine leader peptide; Evalue=2e-10 match=60.61%;	MNTKMMEQFESMDTDMLACVEGGKKFGDCETAISAGIGVGAVFAGPWGAVGLGTVTNMFFCATPVS	ATGAATACAAAAATGATGGAACAATTTGAGAGTATGGATACTGATATGCTTGCTTGCGTTGAAGGTGGTAAAAAATTTGGTGATTGTGAAACTGCAATTTCCGCTGGAATTGGCGTAGGTGCTGTTTTTGCAGGTCCGTGGGGAGCGGTTGGTTTAGGCACGGTTACTAATATGTTTTTTTGTGCTACCCCTGTTAGT
gi_482660080_emb_CAUJ010000071_.3.AOI_02	orf00036	EntA_Immun	9682	9978	-	39097	39393	+	#ff3f3f	EntA-Immun: Bacteriocin self-immunity protein: protective against enterocin-variant	PF08951	Species=Lactobacillus sakei | | I<br>match=45.26%|Evalue=9e-25<br>UniRef:<a href=http://www.uniprot.org/uniprot/Q6KCG1_LACSK>Q6KCG1_LACSK</a>	MRGLKWFSGGVERRREAIIILEELIQNIKCDSQLLPLKDILISYECELKKGSISIPYTLSRMNIEISNVLIENALHLSEIQSDQIKKLRELSNIRYGY	ATGAGAGGGTTAAAGTGGTTTTCTGGTGGGGTTGAAAGACGCCGTGAAGCTATCATCATATTAGAAGAACTTATTCAAAATATAAAATGTGATTCTCAACTCCTCCCTTTGAAAGATATATTGATTTCTTACGAATGTGAATTAAAGAAAGGAAGTATATCGATTCCTTATACCCTTAGTCGAATGAACATTGAAATTTCAAATGTATTAATTGAAAATGCGCTCCATTTATCTGAAATTCAGTCTGATCAGATAAAAAAATTAAGAGAATTATCTAATATTAGATATGGATAC
gi_482660080_emb_CAUJ010000071_.3.AOI_02	orf00037	222.2;ubericin-A	9978	10199	-	38876	39097	+	#70c947	BlpJ: bacteriocinII; Bacteriocin_II; ComC; Bacteriocin_IIa; 268.1;Coagulin222.2;ubericin-A	<a href=http://pfam.xfam.org/family/></a>; <a href=http://pfam.xfam.org/family/PF01721>PF01721</a>; <a href=http://pfam.xfam.org/family/PF03047>PF03047</a>; <a href=http://pfam.xfam.org/family/PF10439>PF10439</a>;	NA; Class II bacteriocin; NA; Bacteriocin class II with double-glycine leader peptide; Evalue=3e-07 match=34.43%;Evalue=7e-23 match=54.29%;	MNLKMMEQFEIMDTEMLASKVGGKTIYYGNGLYCDNSKGCWVNWPEAINKILTNSIVNGFSGGNAGWNSGGPL	ATGAATCTAAAAATGATGGAACAATTTGAGATTATGGATACTGAGATGCTTGCGAGTAAAGTAGGAGGAAAAACAATATATTACGGTAATGGTTTATATTGTGATAACTCTAAAGGTTGCTGGGTAAACTGGCCTGAAGCTATAAATAAAATTCTTACTAATTCTATTGTTAATGGATTTTCAGGTGGGAATGCAGGTTGGAATTCGGGTGGACCTCTA
gi_482660080_emb_CAUJ010000071_.3.AOI_02	orf00039	orf00039	10440	11129	-	37946	38635	+	#d5dce8	CAAX protease, self immunity			MKKYQLLFKTSAILSYLFFVFGLSQLTLIVQNYWQFSSQIGNFFWIQNILSLLFSGVMIWILVKTGHGYLFRVPREKWLCYSILAVLVAIVHISFNIQTAKHVQSIAEGWAVLIGYSGTNFAELGIYIALFFLVPLMEELIYRGLLQHAFFKHSRFGLDLLLPSILFALPHFSSLPSLLDIFVFATVGIIFAGLTRYTKSIYPSYAVHVINNIFATLPFLLTFLHRIFS	ATGAAAAAGTACCAGCTTCTATTCAAAACAAGTGCAATTTTATCCTACCTATTTTTCGTATTTGGCCTTTCTCAACTGACGCTTATTGTCCAAAACTATTGGCAATTTTCTTCCCAGATAGGAAATTTCTTCTGGATTCAAAATATCTTGAGTTTGCTATTTAGCGGAGTCATGATTTGGATTCTTGTTAAGACAGGCCATGGCTATCTCTTTCGCGTTCCGAGAGAAAAATGGCTCTGTTATTCAATTCTGGCAGTCCTAGTAGCGATAGTTCATATATCTTTTAATATTCAGACAGCTAAACATGTCCAGTCAATTGCGGAAGGTTGGGCTGTATTGATTGGTTATAGTGGGACTAACTTTGCAGAGCTAGGTATTTATATAGCCCTGTTCTTTCTG…
gi_482660080_emb_CAUJ010000071_.3.AOI_02	orf00041	orf00041	11454	11702	-	37373	37621	+	#d5dce8	BlpZ?: hypothetical (membrane) protein			MYKHLFFPYSKTLDWLTPYILVLASDTIAFNVFVLTFVSVVIFYFLNPMIAFIAIFFGAGYVVGFWLLKWFVLERLEVKNGL	ATGTATAAACACTTATTTTTCCCATATTCGAAAACCTTAGACTGGTTGACACCCTATATTCTAGTCTTGGCTTCCGACACCATTGCCTTCAATGTTTTTGTGCTAACCTTTGTGTCCGTTGTGATCTTCTATTTCTTGAATCCCATGATAGCTTTTATAGCTATATTCTTTGGTGCTGGCTATGTTGTCGGATTTTGGTTATTAAAATGGTTTGTTTTAGAGAGATTGGAGGTAAAGAATGGCTTG
gi_482660080_emb_CAUJ010000071_.3.AOI_02	orf00042	157.2;Mutacin_IV	11782	12000	-	37075	37293	+	#70c947	hypot. bacteriocin: Lactococcin; Bacteriocin_IIa; 157.2;Mutacin_IV	<a href=http://pfam.xfam.org/family/PF04369>PF04369</a>; <a href=http://pfam.xfam.org/family/PF10439>PF10439</a>;	Lactococcin-like family; Bacteriocin class II with double-glycine leader peptide; Evalue=1e-16 match=44.44%;	MEQSVNNFFILSDEKLTTITAGDKQLADAFLSGVGGAVEGISLCMQTIPFPTPQIYLICAAGGAAASVLWPH	ATGGAACAATCAGTCAATAATTTCTTCATTTTATCCGATGAAAAACTAACAACGATAACAGCTGGTGATAAACAACTTGCAGATGCATTTTTAAGTGGAGTAGGTGGTGCAGTTGAGGGGATTTCGCTTTGTATGCAGACAATCCCTTTCCCAACTCCTCAGATTTATTTGATTTGCGCAGCTGGTGGGGCAGCAGCTTCAGTTTTATGGCCACAT
gi_482660080_emb_CAUJ010000071_.3.AOI_02	orf00043	orf00043	12006	12380	-	36695	37069	+	#8fbcb9	Bacteriocin self-immunity protein: putative		Species=Streptococcus thermophilus (strain ATCC BAA-250 / LMG 18311) | | I<br>match=31.71%|Evalue=2e-06<br>UniRef:<a href=http://www.uniprot.org/uniprot/Q5M2X2_STRT2>Q5M2X2_STRT2</a>	MRYRLFVVIFLTSILDILLGTFLQISNVSIGWLVLYSGLFEVGVFLLANKGVTVKIKEVEIRNRFKFIFGKTLWFQILLLIFVMVKLYLGLDAKLILFYGHIFIIFNALIYLLSTSQINLIKKV	ATGAGATATAGATTATTTGTTGTTATTTTCTTGACTAGTATTTTGGATATTCTTTTAGGGACATTTTTGCAAATCTCTAATGTATCGATTGGGTGGCTTGTTCTCTACAGTGGCTTGTTCGAAGTAGGAGTTTTCCTTCTTGCTAATAAAGGAGTAACGGTAAAAATCAAGGAAGTAGAAATTCGAAATCGCTTTAAATTTATTTTTGGAAAAACGTTATGGTTTCAAATCCTTTTGCTTATCTTTGTGATGGTCAAACTGTATCTTGGTTTGGATGCGAAGTTGATTTTATTTTACGGACATATTTTCATTATCTTTAATGCCTTAATCTATCTTTTATCTACTAGCCAAATTAATTTAATAAAGAAAGTG
gi_482660080_emb_CAUJ010000071_.3.AOI_02	orf00045	orf00045	12414	12608	-	36467	36661	+	green	BlpN/K: used in multiplex PCR: Bacteriocin_IIa;	<a href=http://pfam.xfam.org/family/PF10439>PF10439</a>;	Bacteriocin class II with double-glycine leader peptide;	MDTDMLACVEGGDKVGAGEVVQALGVCTIGGAALGSVIPVVGTLAGGILGAQFCTAAWGALRAS	ATGGATACTGATATGCTCGCTTGCGTTGAAGGTGGAGATAAAGTAGGGGCTGGAGAAGTTGTTCAAGCATTGGGAGTTTGTACAATAGGAGGTGCAGCTCTGGGGAGTGTTATCCCAGTTGTGGGAACTCTTGCTGGAGGGATTTTAGGAGCACAGTTCTGTACAGCAGCTTGGGGAGCTTTGAGGGCAAGT
gi_482660080_emb_CAUJ010000071_.3.AOI_02	orf00046	orf00046	12640	12795	+	36280	36435	-	#d5dce8	hypothetical protein			MTNTPFLFLIFNFCPVATLTSLVYHCFLKFFIQILNCHRNVLNCKNFIIKG	ATGACAAATACTCCTTTTTTATTTTTAATTTTTAATTTTTGTCCTGTTGCAACCTTGACAAGTTTAGTATATCATTGTTTTTTAAAATTTTTCATCCAAATCTTGAATTGTCATCGAAACGTCTTGAATTGCAAAAACTTCATTATAAAAGGG
gi_482660080_emb_CAUJ010000071_.3.AOI_02	orf00048	orf00048	12836	13252	-	35823	36239	+	#d5dce8	BlpL/pncH: Bacteriocin self-immunity protein: ORF540 acording to Lopez-Lopez			MEKAMKKIFLKKRTIFLARLFLGQLPLLVSTYLFLSRQFLNFSLVFQFLLVVINLASILATVYLTREMKIREFEDDDLVSPRTNQLMFIGLTGFMSIICLYRGITAGESYQQLIAYIGAVLCLLIMLLLIWGLKYYKK	ATGGAGAAAGCAATGAAAAAAATATTTTTAAAAAAACGGACCATCTTCCTTGCGAGATTGTTCCTAGGGCAGTTGCCCTTGCTTGTCTCTACTTATCTATTTCTATCTCGTCAATTTTTAAATTTTTCCTTGGTTTTCCAATTTCTTTTAGTGGTTATTAACTTAGCTTCTATTTTGGCTACTGTTTATCTCACTAGGGAAATGAAGATAAGAGAGTTTGAAGATGATGATTTGGTTAGTCCTAGAACCAATCAACTCATGTTCATCGGCTTGACAGGCTTTATGTCTATTATCTGTTTGTATAGAGGTATCACAGCAGGAGAATCTTACCAACAACTAATCGCTTATATTGGCGCGGTTCTATGCTTGCTTATCATGCTTTTGCTTATTTGGGGTTTG…
gi_482660080_emb_CAUJ010000071_.3.AOI_02	orf00049	orf00049	13269	13589	-	35486	35806	+	#d5dce8	hypothetical protein, role in replication possibly			MKAKYGNQIVDVWEIGQATPKPSWVEEAFQKNYMVWLDNHVRILMAGLNTSLATNIKFGLVGTVGGGFAGYGMYVLGYPGDYIDITNHRVVSAKTFHKSYQILEND	ATGAAGGCAAAATATGGGAATCAAATTGTTGATGTTTGGGAAATTGGTCAAGCAACTCCTAAACCAAGTTGGGTAGAGGAAGCTTTTCAAAAAAATTATATGGTTTGGTTGGATAATCATGTACGCATTCTAATGGCAGGTCTCAACACTTCTCTCGCAACGAATATCAAGTTTGGTCTAGTTGGAACAGTTGGAGGAGGATTCGCTGGTTATGGAATGTATGTTCTTGGTTATCCAGGTGATTATATAGATATCACCAATCATAGAGTTGTTTCTGCTAAAACATTTCACAAAAGTTATCAAATTTTAGAAAATGAT
gi_482660080_emb_CAUJ010000071_.3.AOI_02	orf00050	39.2;BlpU	13604	13831	-	35244	35471	+	#70c947	BlpJ: ComC; Bacteriocin_IIa; 39.2;BlpU	<a href=http://pfam.xfam.org/family/PF03047>PF03047</a>; <a href=http://pfam.xfam.org/family/PF10439>PF10439</a>;	NA; Bacteriocin class II with double-glycine leader peptide; Evalue=1e-10 match=75.86%;	MNTKMMEQFEIMDTDMLAKVEGGFGGWGDMIAGLLGGLAPSPTLDQLNGKWPIIHFSKPCGPYGIGGTPNSCNGI	ATGAATACAAAAATGATGGAACAATTTGAGATTATGGATACTGATATGCTTGCGAAAGTTGAAGGAGGTTTCGGAGGTTGGGGAGATATGATTGCTGGTTTATTGGGTGGGCTAGCACCTTCTCCAACTTTGGATCAATTAAATGGTAAGTGGCCTATTATACATTTTTCAAAACCATGTGGTCCTTATGGTATAGGGGGAACTCCAAACTCATGTAATGGTATT
gi_482660080_emb_CAUJ010000071_.3.AOI_02	orf00053	orf00053	14019	14423	-	34652	35056	+	#d5dce8	BlpL/pncH: Bacteriocin self-immunity protein: ORF540-like			MKTFLAKKRNIFLARLFLCQLPLLVSTYLFLSRQFLNFSLVFQFLLVVINLASILVTVYLTREMRIREFEDDDLVSPRINQLMFIGLTGFMCIICLYRGITATESYQQLIVYIGAILCLIIMLLLIWGLKYYKK	ATGAAAACTTTTCTTGCTAAAAAACGGAATATCTTCCTTGCGAGATTGTTCCTATGTCAGTTGCCCTTACTTGTCTCCACTTATCTATTTCTATCTCGTCAGTTTTTAAATTTTTCCTTAGTTTTCCAATTTCTTTTAGTGGTTATTAATTTAGCTTCTATTTTGGTTACTGTTTACCTTACTAGGGAAATGAGGATAAGAGAGTTTGAAGATGATGATTTGGTTAGTCCTAGAATCAATCAACTTATGTTCATCGGCTTGACAGGCTTTATGTGTATTATTTGTTTGTATAGAGGTATCACAGCAACAGAATCCTATCAGCAATTAATTGTCTACATTGGCGCTATTCTCTGCTTGATTATCATGCTTCTGCTCATTTGGGGATTGAAGTATTATAAA…
gi_482660080_emb_CAUJ010000071_.3.AOI_02	orf00054	orf00054	14420	14581	-	34494	34655	+	#d5dce8	hypothetical protein, membrane and or immunity			MKKKILIILTLYLIMSIFLYPLRESIWYHLFYTIAYLIAVMIYFVLIKKKEKE	ATGAAGAAAAAAATATTAATCATTTTAACCTTGTATCTGATCATGTCCATCTTTCTTTATCCGCTTAGGGAGAGTATTTGGTATCATCTATTTTATACCATAGCCTATCTGATTGCGGTTATGATCTATTTTGTTTTAATTAAAAAGAAAGAAAAGGAA
gi_482660080_emb_CAUJ010000071_.3.AOI_02	orf00057	orf00057	15151	15354	-	33721	33924	+	green	pncT: ggmotif; Bacteriocin_IIa;	<a href=http://pfam.xfam.org/family/></a>; <a href=http://pfam.xfam.org/family/PF10439>PF10439</a>;	NA; Bacteriocin class II with double-glycine leader peptide;	MKKIDYIALNEVELETISGGDDCFIGDIGCIGWGILKSIGGMIKPGPYVPPVCIPKSSWNPAPPVPC	ATGAAAAAAATTGATTATATTGCTTTGAATGAAGTAGAATTAGAGACAATTAGTGGTGGAGATGACTGTTTTATTGGAGATATCGGATGTATTGGCTGGGGGATTTTGAAGAGTATCGGAGGGATGATAAAACCTGGTCCATATGTTCCTCCAGTATGCATTCCAAAAAGTTCATGGAATCCTGCACCTCCAGTTCCATGT
gi_482660080_emb_CAUJ010000071_.3.AOI_02	orf00059	38.2;BlpO	15668	15871	-	33204	33407	+	#70c947	BlpM/Q: ComC; Bacteriocin_IIa; 38.2;BlpO	<a href=http://pfam.xfam.org/family/PF03047>PF03047</a>; <a href=http://pfam.xfam.org/family/PF10439>PF10439</a>;	NA; Bacteriocin class II with double-glycine leader peptide; Evalue=1e-08 match=73.91%;	MNTKMMSQFSVIDNEMLDRIEGGIFGVDDAVFWTVGGYVVGRIVDTAIGDFTNQCRKNPHQWFCVRV	ATGAATACAAAAATGATGTCACAATTTTCTGTTATAGATAATGAAATGCTTGATAGAATAGAGGGAGGAATATTTGGGGTTGACGATGCTGTGTTTTGGACGGTAGGTGGCTATGTTGTAGGTAGAATTGTTGATACAGCAATTGGTGATTTTACGAATCAATGCCGGAAAAATCCTCATCAGTGGTTCTGTGTTCGTGTA
gi_482660080_emb_CAUJ010000071_.3.AOI_02	orf00063	LanT	16153	18306	+	30769	32922	-	pink	ComA: ABC transporter: Bacteriocin processing peptidase / Bacteriocin export ABC transporter	PF00005;PF03412	Species=Streptococcus pneumoniae SP18-BS74 | | T<br>match=96.23%|Evalue=0.0<br>UniRef:<a href=http://www.uniprot.org/uniprot/A5MCT5_STRPN>A5MCT5_STRPN</a>	MTSYKRTFVPQIDARDCGVAALASIAKFYGSDFSLAHLRELAKTNKEGTTALGIVKAANEMGFETRPVQADKTLFDMSDVPYPFIVHVNKEGKLQHYYVVYQTRKDYLIIGDPDPSVKITKMSKERFFSEWTGVAIFLAPKPSYQPHKDKKNGLLSFLPLIFKQKSLIAYIVLSSLLVTIINIGGSYYLQGILDEYIPNQMKSTLGIISIGLIITYILQQAMSFSRDYLLTVLSQRLSIDVILAYIRHIFELPMSFFATRRTGEIISRFTDANSIIDALASTILSLLLDVSILILVGSVLLAQNPNLFLLSLISVPIYMFIIFSFMKPFEKMNHDVMQSNSMVSSAIIEDINGIETIKSLTSEENRYQNIDSEFVDYLEKSFKLTKYSILQTNLKQGTK…	ATGACTTCTTATAAACGTACATTTGTTCCCCAAATAGATGCTAGAGACTGTGGTGTCGCTGCCTTAGCCTCGATTGCCAAATTCTATGGTTCAGATTTTTCTCTAGCTCACTTGAGAGAACTTGCAAAGACCAATAAAGAAGGGACGACTGCTCTTGGCATTGTAAAAGCCGCAAATGAAATGGGCTTTGAAACAAGGCCTGTTCAAGCAGATAAAACGCTCTTTGACATGAGTGATGTCCCCTATCCATTTATCGTTCACGTTAACAAAGAAGGGAAACTCCAACATTACTATGTTGTCTATCAAACAAGGAAAGACTATCTGATTATTGGTGATCCTGATCCTTCTGTAAAAATCACCAAAATGTCAAAAGAACGCTTTTTCTCTGAATGGACTGGA…
gi_482660080_emb_CAUJ010000071_.3.AOI_02	orf00065	orf00065	18317	19678	+	29397	30758	-	#8fbcb9	ComB		Species=Streptococcus<br>match=32.52%|Evalue=2e-81<br>UniRef:<a href=http://www.uniprot.org/uniprot/P36498>P36498</a>	MNPNLFRSVEFYQRRYHNYATVLIIPLSLLFTFILIFSLVATKEITVTSQGEITPTSVIASIQSTSDNPILANHLVANQVVEKGDLLIKYSETMEESQKTALETQLQRLEKQKEGLGILKQSLEKATDLFSGEDEFGYHNTFMNFTKQAHDIELGISKTNTEVSNQANLANSSSSAIEQEITKVQQQIGEYQELRDAIINKRARLPTGNPHQSILNRYLVASQEQTQETADEPFLSQINQSIANLESSIANLKIQQAGIGSVATYDNSLETKIEVLRTQFLQTASQQQLAVENQLTELKVQLDQATQRLENNTLTAPSKGIVHLNSEFEGKNRIPTGTEIAQIFPIITDTREVLITYYVSSDYLPLLDKGQTVRLKLEKIGNHGITIIGQLQTIDQTPT…	ATGAATCCTAATCTTTTTAGAAGCGTCGAGTTTTATCAGAGACGTTACCATAATTATGCGACAGTATTGATCATACCACTTTCATTACTGTTTACTTTCATCTTAATTTTCTCCCTTGTTGCCACAAAAGAAATTACCGTTACGTCACAAGGAGAAATTACCCCTACAAGTGTCATTGCATCCATTCAGTCAACTAGTGATAATCCTATCCTAGCTAATCATTTAGTGGCAAATCAAGTAGTTGAAAAAGGTGACTTACTCATCAAATACTCTGAAACAATGGAAGAAAGTCAGAAAACTGCCTTAGAAACTCAGTTACAAAGACTTGAGAAGCAAAAAGAAGGACTTGGAATTTTGAAACAAAGCTTAGAAAAAGCGACTGATCTTTTTTCTGGTGAG…
Regulatory cluster 400 kb downstream, all regulatory genes found in close proximity
n.a.	n.a									ComC			MKNTVKLEQFKEVTETELQEIRGGEWRIPELIRNLIFPKRK	ATGAAAAATACAGTAAAGTTGGAACAATTTAAAGAAGTAACAGAAACAGAATTGCAGGAGATTCGGGGTGGGGAATGGAGAATTCCAGAATTAATACGTAATCTTATTTTTCCAAAAAGAAAATAA
n.a.	n.a									ComD			MNLFGLVIAFFYVFIISKIYEWTCNATKKEKYIYSLYVFLLQLILEEIMYLLALDGYGLSKFLFPLLIFGYFVGFQKYDKSKGVFISLLFSLLYHSSNNFISVTLSSITGDDIALEYNNYFIIFVLILTYLVIKIVISYFHLEFKYFDKEYLYSFLKKVLYAFIFLHIVSFISDIVSTISHLNSFGSILSTIVFICLLLIFFAMNSYKVQIEKEIALKQKKFEQKHLQTYTDEIVKLYNEIRGFRHDYAGMLVSMQMAIDSEDLQEIDRVYNEVLVKANQKLRSEKYTYFDLNNLEDSALRSLIAQSIVYARNNDVEFTLEVKDVITRLSMDLLDLVRIMSILLNNAVEGAADSYLKQMEVAVIKMDFETVIVIQNSCKITMTPSEDLFALGFSTKGRN…	ATGAATTTATTTGGATTAGTAATAGCTTTTTTTTATGTTTTTATCATTAGTAAAATTTATGAATGGACTTGTAATGCAACTAAAAAAGAAAAATATATTTATAGTCTTTATGTCTTTTTACTACAATTAATATTAGAAGAAATAATGTATTTGCTAGCCTTAGATGGTTACGGTTTGTCTAAATTTTTATTTCCTTTACTCATATTCGGTTACTTTGTTGGATTTCAGAAGTATGATAAGTCTAAGGGAGTTTTTATAAGCCTATTATTTTCTCTCTTATATCATAGTAGTAATAACTTTATATCGGTAACTTTATCATCTATAACAGGAGATGATATTGCATTAGAATATAATAATTATTTTATTATATTTGTACTTATTTTAACCTATTTGGTTATT…
n.a.	n.a									ComE			MKVLILEDVIEHQVRLERILNEISEESNIPISYKTTGKVREFKEYIENDEVNQLYFLDIDIHGIEKKGFEVAQFIRHHNPYAIIVFITSRSEFATLTYKYQVSALDFVDKDINDELFKKRIEQSIFYTKSMLLENEDVVDYFDYNYKGNDLKIPYHDILYIETTGVSHKLRIIGKNFAKEFYGTMTDIQEKDKHTQRFYSPHKSFLINIGNVREIDRKNLEVVFYEDHRCPITRLKVRKLKDILEKKTKK	ATGAAAGTATTAATTTTAGAAGATGTTATTGAGCATCAAGTGAGACTAGAGAGAATATTGAATGAAATCTCGGAGGAATCAAATATTCCTATTTCTTACAAGACAACAGGAAAAGTTCGTGAGTTTAAGGAATATATCGAAAATGATGAAGTAAATCAGCTTTATTTCCTAGATATCGATATTCACGGAATTGAGAAAAAGGGCTTTGAAGTGGCACAGTTTATCCGTCATCACAATCCTTATGCTATTATTGTCTTTATTACCAGTCGATCTGAATTTGCTACCTTAACGTACAAATACCAGGTATCAGCTCTAGATTTTGTAGACAAAGACATCAATGATGAATTGTTCAAAAAACGTATCGAGCAGAGTATTTTTTACACTAAGAGCATGCTGCTT…
Only representative ORF were selected; others were either questionable or contained very short peptides of unknown function or even artefacts
