# Supplementary material for: Isolation and Bacteriocin-Related Typing of Streptococcus dentisani
Source: Front Cell Infect Microbiol. 2019 Apr 16;9:110. doi: 10.3389/fcimb.2019.00110 (PMC6476965; doi:10.3389/fcimb.2019.00110)
Supplement: Supplementary file 3 [file Table_3.XLSX]

## Sheet: Tabelle1
	preliminary annotation (prior fine-editing); genes for typing marked yellow		S. oralis spp. dentisani				.6249							oralis	mitis
			7746	M143	SK 95	RH 70047 11	ATCC 6249	Y_5914_11	843_SPSE	Y_5914_11	843_SPSE	Y_5914_11	843_SPSE	UMB 0008	UMB 0079b
	match Sdenti-16SF		.+	.+	.+	.+	.+	.+	.+	.+	.+	.+	.+	.-	.-
	match Sdenti-16SR		.+	.+	.+	.+	.-	.-	.-	.-	.-	.-	.-	.-	.-
	16S dentisani Cluster		.+	.+	.+	.+	.-	.-	.-	.-	.-	.-	.-	.-	.-
	Konkatemer dentisani Cluster		.+	.+	.+	.+	.+	.+	.+	.+	.+	.+	.+	.-	.-
			dentisani	dentisani	dentisani	dentisani	.6249	.6249	.6249	.6249	.6249	.6249	.6249	oralis	mitis
	Type 1 (S. dentisani 7746 probiotic like)
	gene function		1	1	1	1	1	2	2	1	1	3	3	1	1
	Putative phosphotransferase YtmP		+	-	-	-	+	+	+	-	-	-	-	+	-
	Putative membrane peptidase YdiL		+	-	-	-	+	+	+	-	-	-	-	+	-
	Putative phosphotransferase YtmP		+	-	-	-	+	+	+	-	-	-	-	+	-
	ComC; Bacteriocin_IIc; 39.2;BlpU		+	-	-	-	-	+	+	+	-	-	-	+	-
	Bacteriocin transport accessory protein, putative		+	-	-	-	+	-	+	+	-	-	-	+	-
	Uncharacterized protein YlxR		+	-	-	-	+	+	-	-	-	-	-	+	-
	Transcription termination/antitermination protein NusA		+	-	-	-	+	+	-	-	-	-	-	+	-
	Ribosome maturation factor RimP		+	-	-	-	+	+	-	-	-	-	-	+	-
	tRNA (guanine-N(7)-)-methyltransferase		+	-	-	-	+	+	-	-	-	-	-	+	-
	Putative bacteriocin immunity protein		+	-	-	-	+	-	+	+	-	-	-	-	-
	Bacteriocin processing peptidase / Bacteriocin export ABC transporter		+	-	-	-	+	+	-	-	-	-	-	+	-
	Transport protein ComB		+	-	-	-	-	+	+	-	-	-	-	+	-
	Probable ribosomal protein in infB 5'region		+	-	-	-	+	+	-	-	-	-	-	-	-
	ComC; Bacteriocin_IIc; 32.2;BlpM		+	-	-	-	-	-	+	-	-	-	-	+	-
	Bacteriocin_IIc; 36.2;BlpN		+	-	-	-	-	-	+	-	-	-	-	+	-
	ComC; Bacteriocin_IIc; 27.2;BlpJ		+	-	-	-	-	+	-	+	-	-	-	-	-
	ComC; Bacteriocin_IIc; 38.2;BlpO		+	-	-	-	-	+	-	+	-	-	-	-	-
	response regulator		-	-	-	-	+	+	+	-	-	-	-	+	-
	Bacteriocin production related histidine kinase		-	-	-	-	+	+	+	-	-	-	-	+	-
	ggmotif; LE-DUF; ComC; L_biotic_typeA; Bacteriocin_IIc;		-	-	-	-	+	+	+	-	-	-	-	+	-
	Lactococcin; Bacteriocin_IIc; 7.2;Acidocin_LF221B(GassericinK7B)		+	-	-	-	+	-	-	-	-	-	-	-	-
	bacteriocinII; Bacteriocin_II; ComC; Bacteriocin_IIc; 268.1;Coagulin222.2;ubericin-A		+	-	-	-	-	-	+	-	-	-	-	-	-
	Lactococcin; Bacteriocin_IIc; 157.2;Mutacin_IV		+	-	-	-	-	-	-	+	-	-	-	-	-
	Bacteriocin self-immunity protein, putative		+	-	-	-	-	-	-	+	-	-	-	-	-
	ComC; Bacteriocin_IIc; 196.2;putative_bacteriocin		-	-	-	-	+	-	-	+	-	-	-	+	-
	StxR		-	-	-	-	+	+	+	-	-	-	-	-	-
	BlpN/K		+	-	-	-	-	-	-	-	-	-	-	-	-
	Bacteriocin_IIb: earlier Bacteriocin_IIc;		+	-	-	-	-	-	-	-	-	-	-	-	-
	pncT		+	-	-	-	-	-	-	-	-	-	-	-	-
	ComC; Bacteriocin_IIc; 38.2;BlpO		-	-	-	-	-	+	+	-	-	-	-	-	-
	ComC; Bacteriocin_IIc; 263.1;Gassericin33.2;BlpM		-	-	-	-	-	-	+	-	-	-	-	+	-
	Lactococcin; Bacteriocin_IIc; 7.2;Acidocin_LF221B(GassericinK7B)		-	-	-	-	-	-	+	-	-	-	-	+	-
	bacteriocinII; Bacteriocin_II; ComC; Bacteriocin_IIc; 268.1;Coagulin222.2;ubericin-A		-	-	-	-	+	-	-	+	-	-	-	-	-
	Bacteriocin export accessory protein		-	-	-	-	+	+	-	-	-	-	-	-	-
	ComC; Bacteriocin_IIc;		-	-	-	-	+	-	+	-	-	-	-	-	-
	Protein EcsB		-	-	-	-	+	-	+	-	-	-	-	-	-
	Putative membrane peptidase YdiL		-	-	-	-	-	-	+	-	-	-	-	-	-
	28.2;BlpK		-	-	-	-	-	-	-	+	-	-	-	-	-
	31.2;BlpM		-	-	-	-	-	-	-	+	-	-	-	-	-
	ComC; Bacteriocin_IIc; 26.2;BlpI		-	-	-	-	-	+	-	-	-	-	-	-	-
	Translation initiation factor IF-2		-	-	-	-	-	+	-	-	-	-	-	-	-
	Ribosome-binding factor A		-	-	-	-	-	+	-	-	-	-	-	-	-
	ABC-type transporter ATP-binding protein EcsA		-	-	-	-	+	-	-	-	-	-	-	-	-
	Protein hit		-	-	-	-	+	-	-	-	-	-	-	-	-
	Chaperone protein DnaJ		-	-	-	-	+	-	-	-	-	-	-	-	-
	Bacteriocin processing peptidase Bacteriocin export ABC transporter		-	-	-	-	-	-	+	-	-	-	-	-	-
	ComC; Lactococcin; Bacteriocin_IIc; Mersacidin; 160.1;carnolysins		-	-	-	-	-	-	+	-	-	-	-	-	-
	UPF0177 protein YaiH		-	-	-	-	-	-	+	-	-	-	-	-	-
	ComC; Lactococcin; Bacteriocin_IIc;		-	-	-	-	-	-	+	-	-	-	-	-	-
	Type 2 (S. dentisani, non-probiotic-like)
	Uncharacterized glycosyltransferase HI_1695		-	+	+	-	-	-	-	-	+	-	-	-	-
	Capsular polysaccharide biosynthesis protein CapD		-	+	+	-	-	-	-	-	+	-	-	-	-
	5'-nucleotidase		-	+	+	-	-	-	-	-	+	-	-	-	-
	Probable L-serine dehydratase, alpha chain		-	+	+	-	-	-	-	-	+	-	-	-	-
	Probable L-serine dehydratase, beta chain		-	+	+	-	-	-	-	-	+	-	-	-	-
	Macrolide export ATP-binding/permease protein MacB 2		-	+	+	-	-	-	-	-	+	-	-	-	-
	tRNA-specific 2-thiouridylase MnmA n=811 RepID=MNMA_STRPN		-	+	+	-	-	-	-	-	+	-	-	-	-
	Lactococcin_972; 119.2;Lactococcin_972_(Lcn972)		-	+	+	-	-	-	-	-	+	-	-	-	-
	Lactococcin_972; 119.2;Lactococcin_972_(Lcn972)		-	+	+	-	-	-	-	-	+	-	-	-	-
	Probable peptidoglycan endopeptidase LytE		-	+	-	-	-	-	-	-	+	-	-	-	-
	MutR [Streptococcus mutans]		-	+	-	-	-	-	-	-	+	-	-	-	-
	Arginine-binding extracellular protein ArtP		-	+	+	-	-	-	-	-	-	-	-	-	-
	Argininosuccinate synthase		-	+	+	-	-	-	-	-	-	-	-	-	-
	Argininosuccinate lyase		-	+	+	-	-	-	-	-	-	-	-	-	-
	CTP pyrophosphohydrolase		-	+		-	-	-	-	-	-	-	-	-	-
	Uncharacterized Nudix hydrolase PA4841		-	+	+	-	-	-	-	-	-	-	-	-	-
	8-oxo-dGTP diphosphatase n=358 RepID=MUTT_ECOLI		-	-	+	-	-	-	-	-	+	-	-	-	-
	Uncharacterized transporter YycB		-	-	+	-	-	-	-	-	+	-	-	-	-
	Uncharacterized protein YycB		-	+	-	-	-	-	-	-	-	-	-	-	-
	N-acetylmuramoyl-L-alanine amidase sle1 n=29 RepID=SLE1_STAEQ		-	-	+	-	-	-	-	-	-	-	-	-	-
	Putative DNA-binding protein YwzG		-	-	-	-	-	-	-	-	+	-	-	-	-
	Inner membrane protein YhaI		-	-	-	-	-	-	-	-	+	-	-	-	-
	Type 3 RH 70047 11-like
	tRNA uridine 5-carboxymethylaminomethyl modification enzyme MnmG n=656 RepID=MNMG_STRPN		-	-	-	+	-	-	-	-	+	-	-	-	-
	Ribonuclease J 1		-	-	-	+	-	-	-	-	+	-	-	-	-
	UPF0356 protein SP_0122		-	-	-	+	-	-	-	-	-	-	-	-	-
	tRNA threonylcarbamoyladenosine biosynthesis protein TsaB		-	-	-	+	-	-	-	-	-	-	-	-	-
	Putative ribosomal-protein-alanine acetyltransferase		-	-	-	+	-	-	-	-	-	-	-	-	-
	tRNA N6-adenosine threonylcarbamoyltransferase		-	-	-	+	-	-	-	-	-	-	-	-	-
	MutR-like protein		-	-	-	+	-	-	-	-	-	-	-	-	-
	Lantibiotic efflux protein		-	-	-	+	-	-	-	-	-	-	-	-	-
	Uncharacterized membrane protein HP_1331		-	-	-	+	-	-	-	-	-	-	-	-	-
	L-cystine-binding protein TcyA		-	-	-	+	-	-	-	-	-	-	-	-	-
	D-methionine-binding lipoprotein MetQ		-	-	-	+	-	-	-	-	-	-	-	-	-
	Succinyl-diaminopimelate desuccinylase		-	-	-	+	-	-	-	-	-	-	-	-	-
	Methionine import ATP-binding protein MetN n=359 RepID=METN_STRR6		-	-	-	+	-	-	-	-	-	-	-	-	-
	Methionine import system permease protein MetP		-	-	-	+	-	-	-	-	-	-	-	-	-
